# Supplementary material
Source: PubMed Central journal article supplement (PMC2756121)
Supplement: blood-2009-03-208355_1.pdf [file blood-2009-03-208355_1.pdf]

| Diagnosis                                              | N   | (%)  |
|--------------------------------------------------------|-----|------|
| Cardiac disease and hypertension                       | 185 | (20) |
| Asthma and other pulmonary disease                     | 96  | (10) |
| Diabetes mellitus, thyroid and other endocrine disease | 90  | (10) |
| Gastrointestinal disease                               | 76  | (8)  |
| History of other malignancy                            | 50  | (5)  |
| Seizure disorder and other CNS disease                 | 48  | (5)  |
| Genitourinary disease                                  | 40  | (4)  |
| Hematologic disease                                    | 30  | (3)  |
| Liver disease                                          | 20  | (2)  |
| Autoimmune disease                                     | 19  | (2)  |
| Significant hemorrhage                                 | 16  | (2)  |
| Down syndrome and other chromosomal disorder           | 4   | (0)  |
| Other                                                  | 248 | (27) |
